# Supplementary material for: Antibacterial and Biodegradable Polysaccharide-Based Films for Food Packaging Applications: Comparative Study
Source: MDPI journal article supplement (doi:10.3390/ma15093236), 2022-04-29
Supplement: s1 [file s1]

# Antibacterial and Biodegradable Polysaccharide-Based Films for Food Packaging Applications: Comparative Study

Weronika Janik, Michał Nowotarski, Divine Yutefar Shyntum, Angelika Banaś, Katarzyna Krukiewicz, Stanisław Kudła, Gabriela Dudek

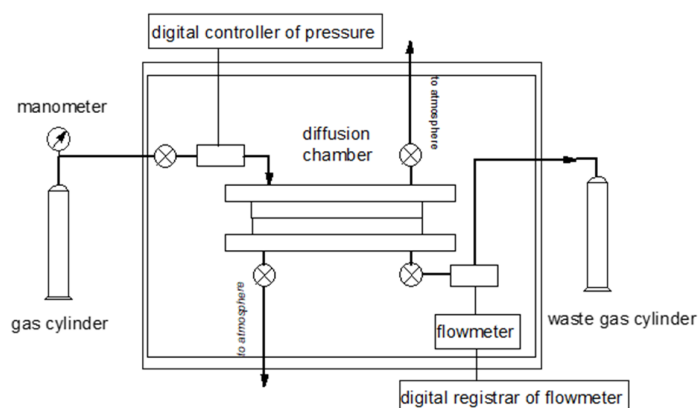

**Figure S1.** Schematic diagram of experimental apparatus for gas permeability testing.

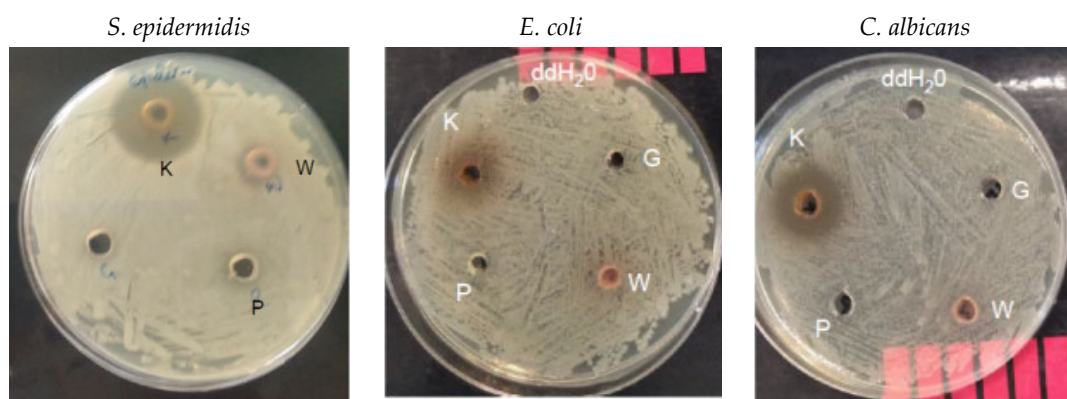

**Figure S2.** Antimicrobial activity of four commercially available extracts: chestnut (K), graviola (G), grape (W), nettle (P) tested against model Gram-positive bacteria (*S. epidermidis*), Gram-negative bacteria (*E. coli*) and yeasts (*C. albicans*); control well was filled with deionized water (ddH<sub>2</sub>O).
